# Supplementary material for: Metastatic breast cancer cells overexpress and secrete miR-218 to regulate type I collagen deposition by osteoblasts
Source: Springer Nature journal article supplement (doi:10.1186/s13058-018-1059-y), 2018-10-22
Supplement: MOESM5 [file 16217460]

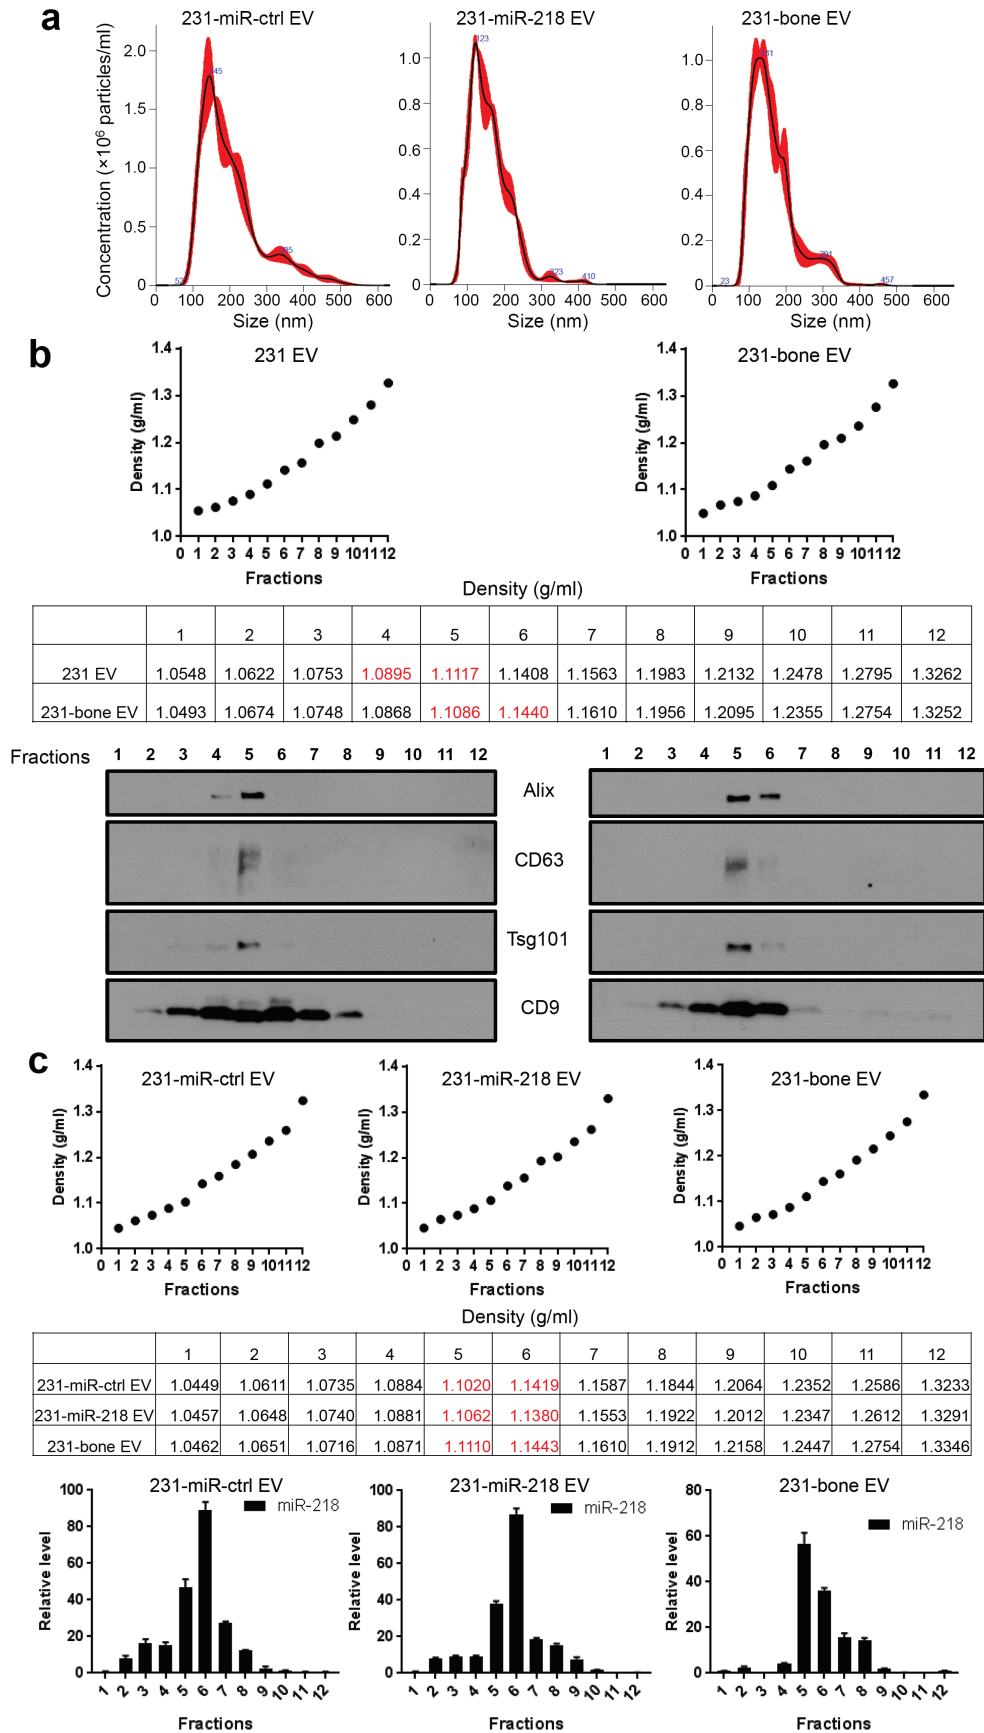

**Fig. S1** EV characterization. **a** EVs pelleted at 110,000  $\times$ g were analyzed by nanoparticle tracking analysis. **b** Density measurement and Western blot of EV fractions collected from indicated cell lines to detect EV markers. **c** Density measurement and RT-qPCR of EV fractions collected from indicated cell lines to detect miR-218 levels.
