# Supplementary material for: Metastatic breast cancer cells overexpress and secrete miR-218 to regulate type I collagen deposition by osteoblasts
Source: Springer Nature journal article supplement (doi:10.1186/s13058-018-1059-y), 2018-10-22
Supplement: MOESM6 [file 16217460]

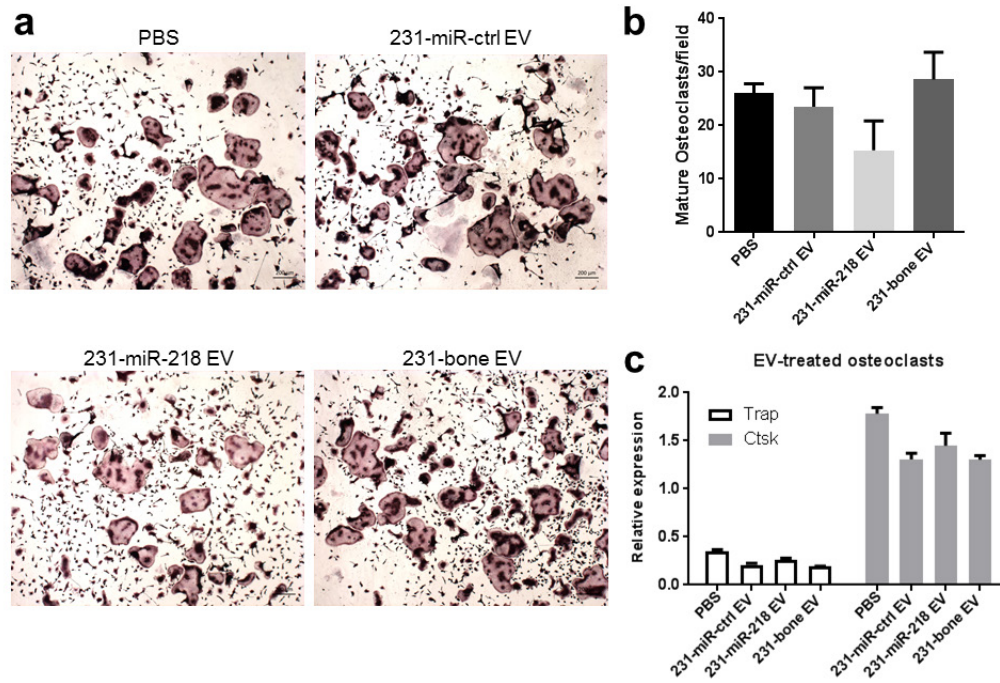

**Fig. S2** Breast cancer-secreted EVs did not regulate osteoclast differentiation. Mouse bone marrow cells were cultured in 40 ng/ml M-CSF for 3 days before EV treatment and further induction of osteoclast differentiation with 40 ng/ml M-CSF and 100 ng/ml RANKL for up to 7 days. **a** Representative TRAP staining images of EV-treated osteoclasts after 7 days of differentiation. **b** Quantitative analysis of TRAP staining in **(a)**. Mature osteoclasts were identified as multinucleated TRAP<sup>+</sup> cells. **c** Relative RNA level of osteoclast differentiation marker genes *Trap* and *Ctsk* normalized to *Rpl19* in primary pre-osteoclast cells treated with indicated EVs and induced for osteoclast differentiation for 5 days.
