# Supplementary material for: Metastatic breast cancer cells overexpress and secrete miR-218 to regulate type I collagen deposition by osteoblasts
Source: Springer Nature journal article supplement (doi:10.1186/s13058-018-1059-y), 2018-10-22
Supplement: MOESM8 [file 16217460]

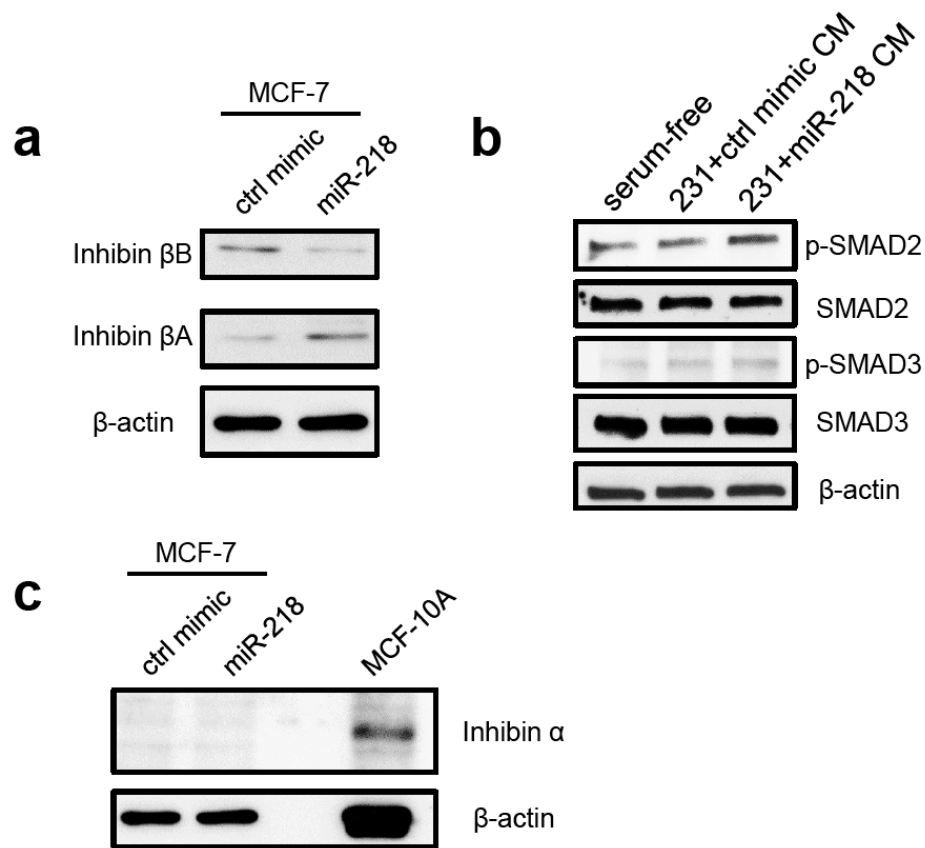

**Fig. S3** miR-218 regulated inhibin  $\beta$  expression and enhanced SMAD signaling in MCF-7 cells. **a** Western blot analyses of inhibin  $\beta$ B and inhibin  $\beta$ A in miRNA mimic-transfected MCF-7 cells at 48 h after transfection. **b** Western blot analyses of phospho-SMAD2/3 in MCF-7 cells that were serum-starved overnight and then treated with CM collected from indicated cells for 30 min. The CM producing cells were transfected, PBS washed at 48 h after transfection, and then incubated with serum-free medium overnight before CM collection. **c** Western blot analysis of inhibin  $\alpha$  in MCF-7 cells. WCL of MCF10A was used as a positive control.
